# Supplementary material for: Evaluation of a multiparametric MRI radiomic-based approach for stratification of equivocal PI-RADS 3 and upgraded PI-RADS 4 prostatic lesions
Source: PubMed Central journal article supplement (PMC7804929; doi:10.1038/s41598-020-80749-5), 2021-01-12
Supplement: 41598_2020_80749_MOESM1_ESM.pdf [file 41598_2020_80749_MOESM1_ESM.pdf]

# Evaluation of a multiparametric MRI radiomic-based approach for stratification of equivocal PI-RADS 3 and upgraded PI-RADS 4 prostatic lesions.

Valentina Brancato<sup>1,\*</sup>, Marco Aiello<sup>1</sup>, Luca Basso<sup>1</sup>, Serena Monti<sup>3</sup>, Luigi Palumbo<sup>2</sup>, Giuseppe Di Costanzo<sup>2</sup>, Marco Salvatore<sup>1</sup>, Alfonso Ragozzino<sup>2</sup>, Carlo Cavaliere<sup>1</sup>

<sup>1</sup> IRCCS SDN, Naples, Italy

<sup>2</sup> Department of Radiology, S. Maria delle Grazie Hospital, Pozzuoli, Italy.

<sup>3</sup> Institute of Biostructures and Bioimaging, National Research Council, Naples, Italy

\* corresponding author: valentina.brancato@synlab.it

## Supplementary Materials

### S1. MRI protocol

| Sequence       | TR (msec) | TE (msec) | ST (mm) | Avg. | BW   | Matrix  | FOV (mm) | FA  |
|----------------|-----------|-----------|---------|------|------|---------|----------|-----|
| T2W Sagittal   | 4740      | 102       | 3       | 3    | 200  | 320×288 | 200×200  | 137 |
| T2WAxial       | 5610      | 102       | 3       | 3    | 200  | 320×310 | 200×200  | 123 |
| T2WCoronal     | 4000      | 102       | 3       | 2    | 200  | 320×310 | 200×200  | 138 |
| T2WLympnodes   | 4000      | 93        | 5.5     | 2    | 130  | 488×197 | 341×390  | 135 |
| DWIa           | 4624      | 77        | 3       | 6    | 1698 | 128×128 | 250×250  | 90  |
| T1 vibe tra FA | 5.5       | 2.34      | 3.5     | 8    | 300  | 320×112 | 208×417  | 2   |
| T1 vibe tra FA | 5.5       | 2.34      | 3.5     | 8    | 300  | 320×112 | 208×417  | 15  |
| T1 vibedynb    | 5.5       | 2.34      | 3.5     | 1    | 300  | 320×112 | 208×417  | 10  |

**Table S1.** Parameters of mpMRI sequences. TR = Repetition Time; TE = Echo Time; ST = Slice Thickness; Avg. = Averages; BW = Bandwidth; FOV = Field of view; FA = Flip angle.

<sup>a</sup> DWI performed with b-values of 50, 400 and 1000 s/mm<sup>2</sup>.

<sup>b</sup> with 32 measurements.

### S2. Feature extraction

| Feature Type            | Feature name                                                                                                                                                                                                                                                                                                                                      |
|-------------------------|---------------------------------------------------------------------------------------------------------------------------------------------------------------------------------------------------------------------------------------------------------------------------------------------------------------------------------------------------|
| Shape<br>[n = 14]       | shape Flatness<br>shape Sphericity<br>Maximum2D Diameter Row<br>shape MeshVolume<br>shape Elongation<br>shape Maximum2DDiameterColumn<br>shape VoxelVolume<br>shape SurfaceArea<br>shape MinorAxisLength<br>shape Maximum3DDiameter<br>shape MajorAxisLength<br>shape LeastAxisLength<br>shape SurfaceVolumeRatio<br>shape Maximum2DDiameterSlice |
| First Order<br>[n = 18] | Skewness<br>Maximum<br>MeanAbsoluteDeviation<br>Kurtosis<br>Range<br>Energy<br>InterquartileRange<br>Variance<br>Mean<br>10Percentile<br>90Percentile<br>Uniformity<br>Median                                                                                                                                                                     |

|                                         |                                                                                                                                                                                                                                                                                                                                                                                                                                                                                                                                       |
|-----------------------------------------|---------------------------------------------------------------------------------------------------------------------------------------------------------------------------------------------------------------------------------------------------------------------------------------------------------------------------------------------------------------------------------------------------------------------------------------------------------------------------------------------------------------------------------------|
|                                         | RobustMeanAbsoluteDeviation<br>RootMeanSquared<br>Minimum<br>TotalEnergy<br>Entropy                                                                                                                                                                                                                                                                                                                                                                                                                                                   |
| <b>Second order (GLCM)</b><br>[n = 24]  | glcm SumSquares<br>glcm Contrast<br>glcm InverseVariance<br>glcm ClusterTendency<br>glcm DifferenceAverage<br>glcm Idm<br>glcm ClusterShade<br>glcm Imc2<br>glcm Idn<br>glcm ClusterProminence<br>glcm Id<br>glcm Imc1<br>glcm Autocorrelation<br>glcm SumEntropy<br>glcm MaximumProbability<br>glcm MCC<br>glcm Correlation<br>glcm JointEntropy<br>glcm Idmn<br>glcm JointAverage<br>glcm SumAverage<br>glcm DifferenceEntropy<br>glcm DifferenceVariance<br>glcm JointEnergy                                                       |
| <b>Second Order (GLRLM)</b><br>[n = 16] | glrlm ShortRunHighGrayLevelEmphasis<br>glrlm RunLengthNonUniformity<br>glrlm ShortRunEmphasis<br>glrlm LongRunLowGrayLevelEmphasis<br>glrlm RunPercentage<br>glrlm GrayLevelVariance<br>glrlm LowGrayLevelRunEmphasis<br>glrlm GrayLevelNonUniformity<br>glrlm RunVariance<br>glrlm LongRunHighGrayLevelEmphasis<br>glrlm ShortRunLowGrayLevelEmphasis<br>glrlm RunLengthNonUniformityNormalized<br>glrlm LongRunEmphasis<br>glrlm GrayLevelNonUniformityNormalized<br>glrlm HighGrayLevelRunEmphasis<br>glrlm RunEntropy             |
| <b>Second Order (GLSZM)</b><br>[n = 16] | glszm SizeZoneNonUniformity<br>glszm LargeAreaEmphasis<br>glszm SmallAreaEmphasis<br>glszm ZonePercentage<br>glszm GrayLevelVariance<br>glszm LargeAreaLowGrayLevelEmphasis<br>glszm GrayLevelNonUniformity<br>glszm SmallAreaHighGrayLevelEmphasis<br>glszm ZoneVariance<br>glszm LargeAreaHighGrayLevelEmphasis<br>glszm HighGrayLevelZoneEmphasis<br>glszm SizeZoneNonUniformityNormalized<br>glszm ZoneEntropy<br>glszm SmallAreaLowGrayLevelEmphasis<br>glszm GrayLevelNonUniformityNormalized<br>glszm LowGrayLevelZoneEmphasis |
| <b>Second Order (NGTDM)</b><br>[n = 5]  | ngtdm Coarseness<br>ngtdm Strength<br>ngtdm Busyness<br>ngtdm Complexity<br>ngtdm Contrast                                                                                                                                                                                                                                                                                                                                                                                                                                            |
| <b>Second Order (GLDM)</b><br>[n = 14]  | gldm LargeDependenceLowGrayLevelEmphasis<br>gldm DependenceNonUniformity                                                                                                                                                                                                                                                                                                                                                                                                                                                              |

|  |                                                                                                                                                                                                                                                                                                                                                                                                                       |
|--|-----------------------------------------------------------------------------------------------------------------------------------------------------------------------------------------------------------------------------------------------------------------------------------------------------------------------------------------------------------------------------------------------------------------------|
|  | gldm SmallDependenceLowGrayLevelEmphasis<br>gldm LowGrayLevelEmphasis<br>gldm LargeDependenceHighGrayLevelEmphasis<br>gldm DependenceEntropy<br>gldm DependenceVariance<br>gldm GrayLevelVariance<br>gldm GrayLevelNonUniformity<br>gldm SmallDependenceEmphasis<br>gldm LargeDependenceEmphasis<br>gldm SmallDependenceHighGrayLevelEmphasis<br>gldm HighGrayLevelEmphasis<br>gldm DependenceNonUniformityNormalized |
|--|-----------------------------------------------------------------------------------------------------------------------------------------------------------------------------------------------------------------------------------------------------------------------------------------------------------------------------------------------------------------------------------------------------------------------|

**Table S2.** Extracted radiomic features. First (n=18) and second order features (n = 75) were extracted from T2, DWI and DCE images, for a total of 93 features for each of the three MRI images. For each lesion, a total of 293 radiomic features were extracted (14 shape features, 93 features including first- and second-order features from T2, 93 features including first- and second-order features from ADC, 93 features including first- and second-order features from DCE-MRI).

### S3. Interobserver agreement

Inter-reader agreement was excellent for both sessions ( $\kappa > 0.8$ ). Specifically, for biparametric MRI session  $\kappa = 0.86$ , while for multiparametric MRI session  $\kappa = 0.91$ . See Table S3. for 95% confidence interval lower and upper bounds for  $\kappa$ -value, as well as the agreement rate between the two readers (percentage of lesions in agreement, divided by the total number of lesions).

| <i>bpMRI session</i> |       | <i>mpMRI session</i> |       |
|----------------------|-------|----------------------|-------|
| $\kappa$ [95% CI]    | AR, % | $\kappa$ [95% CI]    | AR, % |
| 0.86 [0.70-1.00]     | 96.5  | 0.91 [0.81-1.00]     | 95.4  |

**Table S3.** Results of interobserver agreement for each reading session (bpMRI and mpMRI). Numbers in square brackets are 95% confidence interval lower and upper bounds for  $\kappa$ -value. Abbreviations: bpMRI = biparametric MRI; mpMRI = multiparametric MRI;  $\kappa$  = Cohen's kappa; CI = Confidence AR = Agreement Rate.

### S4. Univariate analysis

| Feature name                                      | p-value |
|---------------------------------------------------|---------|
| shape Maximum 2D DiameterRow                      | 0.026   |
| Shape Mesh Volume                                 | 0.031   |
| Shape Voxel Volume                                | 0.029   |
| Shape Surface Area                                | 0.031   |
| Shape Minor Axis Length                           | 0.013   |
| Shape Surface Volume Ratio                        | 0.036   |
| T2 firstorder Kurtosis                            | 0.015   |
| T2 firstorder Energy                              | 0.015   |
| T2 firstorder Total Energy                        | 0.019   |
| T2 glszm Low Gray Level Zone Emphasis             | 0.013   |
| T2 glszm Gray Level Non Uniformity                | 0.047   |
| T2 glszm Small Area Low Gray Level Emphasis       | 0.015   |
| T2 glcm MCC                                       | 0.036   |
| T2 glcm Idn                                       | 0.041   |
| T2 glcm Idmn                                      | 0.05    |
| T2 gldm Small Dependence Low Gray Level Emphasis  | 0.01    |
| T2 gldm Gray Level Non Uniformity                 | 0.047   |
| T2 gldm Low Gray Level Emphasis                   | 0.011   |
| T2 gldm Large Dependence High Gray Level Emphasis | 0.036   |
| T2 glrlm Long Run Low Gray Level Emphasis         | 0.011   |
| T2 glrlm Low Gray Level Run Emphasis              | 0.011   |
| T2 glrlm Gray Level Non Uniformity                | 0.034   |
| T2 glrlm Short Run Low Gray Level Emphasis        | 0.009   |
| T2 glrlm Run Length Non Uniformity                | 0.05    |

|                                               |       |
|-----------------------------------------------|-------|
| ADC glrlm Run Length Non Uniformity           | 0.031 |
| ADC glrlm Gray Level Non Uniformity           | 0.011 |
| ADC ngtdm Strength                            | 0.036 |
| ADC glszm Gray Level Non Uniformity           | 0.011 |
| ADC firstorder Energy                         | 0.022 |
| ADC firstorder Total Energy                   | 0.026 |
| ADC gldm Gray Level Non Uniformity            | 0.027 |
| ADC gldm Dependence Non Uniformity Normalized | 0.047 |
| ADC glcm Imc1                                 | 0.026 |
| DCE glrlm Gray Level Non Uniformity           | 0.029 |
| DCE ngtdm Coarseness                          | 0.038 |
| DCE gldm Gray Level Non Uniformity            | 0.029 |

**Table S4.** Univariate analysis results for PI-RADS 3 lesions. For each feature, p-values refers to Wilcoxon rank-sum test result between PCa PI-RADS 3 and non-PCa PI-RADS 3 lesions.

| Feature name                                       | p-value |
|----------------------------------------------------|---------|
| Shape Elongation                                   | 0.035   |
| T2 glszm LowGrayLevelZoneEmphasis                  | 0.043   |
| T2 glcm MCC                                        | 0.028   |
| T2 glcm Correlation                                | 0.048   |
| T2 glrlm Short Run Low Gray Level Emphasis         | 0.039   |
| T2 glrlm Low Gray Level Run Emphasis               | 0.035   |
| T2 glrlm Long Run Low Gray Level Emphasis          | 0.048   |
| T2 gldm Low Gray Level Emphasis                    | 0.035   |
| ADC glrlm Gray Level Variance                      | 0.004   |
| ADC glrlm Gray Level Non Uniformity Normalized     | 0.012   |
| ADC glrlm Run Entropy                              | 0.02    |
| ADC ngtdm Strength                                 | 0.014   |
| ADC ngtdm Busyness                                 | 0.02    |
| ADC glszm Large Area Emphasis                      | 0.007   |
| ADC glszm Zone Percentage                          | 0.007   |
| ADC glszm Gray Level Variance                      | 0.022   |
| ADC glszm Zone Variance                            | 0.005   |
| ADC glszm Gray Level Non Uniformity Normalized     | 0.025   |
| ADC firstorder Mean Absolute Deviation             | 0.002   |
| ADC firstorder Range                               | 0.039   |
| ADC firstorder Interquartile Range                 | 0.001   |
| ADC firstorder Variance                            | 0.003   |
| ADC firstorder 90 Percentile                       | 0.043   |
| ADC firstorder Uniformity                          | 0.007   |
| ADC firstorder Robust Mean Absolute Deviation      | 0.003   |
| ADC firstorder Entropy                             | 0.028   |
| ADC gldm Dependence Variance                       | 0.012   |
| ADC gldm Gray Level Variance                       | 0.003   |
| ADC gldm Small Dependence Emphasis                 | 0.02    |
| ADC gldm Large Dependence Emphasis                 | 0.011   |
| ADC gldm Small Dependence High Gray Level Emphasis | 0.031   |
| ADC gldm Dependence Non Uniformity Normalized      | 0.01    |
| ADC glcm Sum Squares                               | 0.005   |
| ADC glcm Cluster Tendency                          | 0.004   |
| ADC glcm Cluster Shade                             | 0.043   |
| ADC glcm Imc2                                      | 0.012   |
| ADC glcm Cluster Prominence                        | 0.007   |
| ADC glcm Imc1                                      | 0.048   |

|                          |       |
|--------------------------|-------|
| ADC glcm Autocorrelation | 0.028 |
| ADC glcm Sum Entropy     | 0.025 |
| ADC glcm MCC             | 0.008 |
| ADC glcm Joint Average   | 0.048 |
| ADC glcm Sum Average     | 0.048 |

**Table S5.** Univariate analysis results for PI-RADS 3 lesions. For each feature, p-values refers to Wilcoxon rank-sum test result between PCa upPI-RADS4 and non-PCa upPI-RADS4 lesions.

## S5. Prediction performance of classification tasks

| Order | PI-RADS 3                                                                                            |                      |                      |                      |                      | upPI-RADS 4                                                             |                      |                      |                      |                      |
|-------|------------------------------------------------------------------------------------------------------|----------------------|----------------------|----------------------|----------------------|-------------------------------------------------------------------------|----------------------|----------------------|----------------------|----------------------|
|       | Features                                                                                             | AUC $\pm$ SE         | Sensitivity $\pm$ SE | Specificity $\pm$ SE | Accuracy $\pm$ SE    | Features                                                                | AUC $\pm$ SE         | Sensitivity $\pm$ SE | Specificity $\pm$ SE | Accuracy $\pm$ SE    |
| 1     | T2 gldm<br>SDLGLE                                                                                    | 0.736 $\pm$<br>0.005 | 0.76 $\pm$<br>0.01   | 0.424 $\pm$<br>0.013 | 0.653 $\pm$<br>0.006 | ADC IR                                                                  | 0.892 $\pm$<br>0.004 | 0.869 $\pm$<br>0.006 | 0.622 $\pm$<br>0.014 | 0.818 $\pm$<br>0.004 |
| 2     | T2 glrlm<br>SRLGLE; T2<br>glrlm LGLRE;                                                               | 0.759 $\pm$<br>0.007 | 0.804 $\pm$<br>0.009 | 0.513 $\pm$<br>0.012 | 0.712 $\pm$<br>0.005 | ADC IR;<br>T2 glcm<br>MCC                                               | 0.88 $\pm$<br>0.005  | 0.85 $\pm$<br>0.007  | 0.598 $\pm$<br>0.014 | 0.8 $\pm$<br>0.005   |
| 3     | T2 glrlm<br>SRLGLE; T2<br>glrlm LGLRE;<br>ADC gldm<br>GLNU                                           | 0.718 $\pm$<br>0.008 | 0.755 $\pm$<br>0.009 | 0.504 $\pm$<br>0.013 | 0.677 $\pm$<br>0.006 | ADC<br>LAE;<br>ADC IR;<br>T2 glcm<br>MCC                                | 0.875 $\pm$<br>0.005 | 0.823 $\pm$<br>0.006 | 0.633 $\pm$<br>0.016 | 0.788 $\pm$<br>0.005 |
| 4     | ADC gldm<br>GLNU; T2<br>gldm SDLGLE;<br>T2 glrlm<br>LGLRE; T2<br>glrlm SRLGLE                        | 0.692 $\pm$<br>0.008 | 0.731 $\pm$<br>0.009 | 0.536 $\pm$<br>0.013 | 0.673 $\pm$<br>0.006 | ADC<br>LAE;<br>ADC IR;<br>T2 glcm<br>MCC; T2<br>LGLE                    | 0.843 $\pm$<br>0.007 | 0.8 $\pm$<br>0.007   | 0.603 $\pm$<br>0.016 | 0.765 $\pm$<br>0.005 |
| 5     | ADC gldm<br>GLNU; T2<br>gldm SDLGLE;<br>T2 glrlm<br>LGLRE; T2<br>glrlm SRLGLE;<br>T2 glszm<br>SALGLE | 0.655 $\pm$<br>0.008 | 0.716 $\pm$<br>0.009 | 0.485 $\pm$<br>0.014 | 0.652 $\pm$<br>0.006 | ADC<br>LAE;<br>ADC IR;<br>T2 glcm<br>MCC; T2<br>gldm<br>LGLE;<br>ADC CS | 0.761 $\pm$<br>0.01  | 0.795 $\pm$<br>0.007 | 0.541 $\pm$<br>0.018 | 0.752 $\pm$<br>0.005 |

**Table S6.** Results of multivariate analysis for PI-RADS 3 and upPI-RADS 4 lesions. For each model (from order 1 to 5), AUC, sensitivity, specificity and accuracy were reported with the standard error on a 95% confidence interval over all bootstrap sample. Abbreviations: PI-RADS = Prostate Imaging and Reporting and Data System; upPI-RADS = upgraded PI-RADS; AUC = Area Under the ROC Curve; SE = Standard Error; ADC = Apparent Diffusion Coefficient; glcm = gray level co-occurrence matrix; glrlm = grey level run length matrix; gldm = gray level dependence matrix; glszm = grey level size zone matrix; SDLGLE = Small Dependence Low Gray Level Emphasis; SALGLE = Small Area Low Gray Level Emphasis; SRLGLE = Short Run Low Gray Level Emphasis; LAE = Large Area Emphasis; IR = Interquartile Range; LGLE = Low Gray Level Emphasis; CS = Cluster Shade; MCC = Maximal Correlation Coefficient.
